# Supplementary material for: Inhibiting myeloid-derived suppressor cell trafficking enhances T cell immunotherapy
Source: JCI journal article supplement (doi:10.1172/jci.insight.126853), 2019-04-03
Supplement: sd1 [file 1]

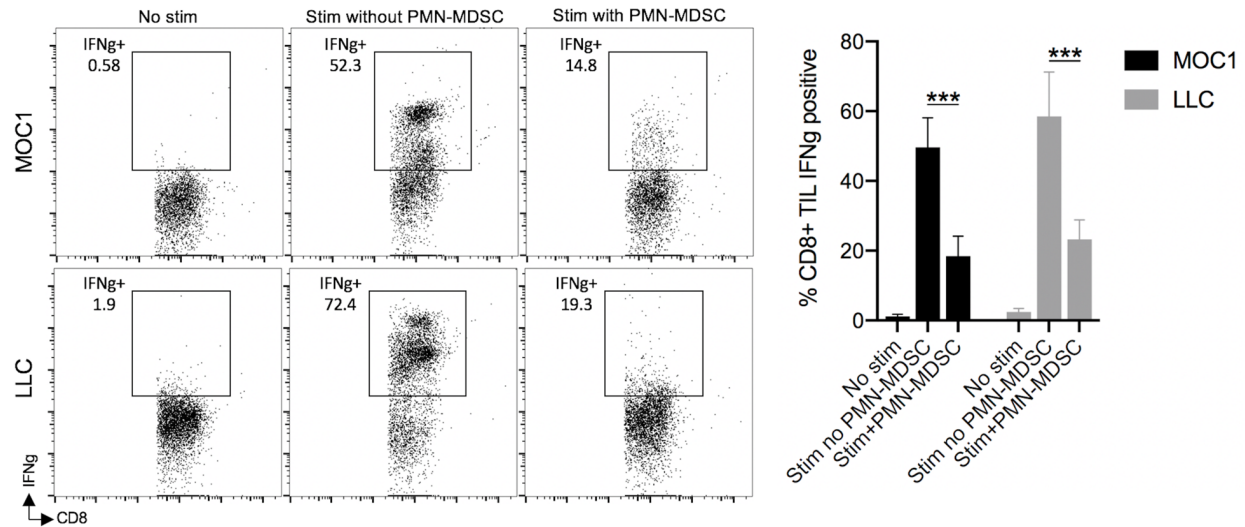

### Supplemental Figure 1 – Tumor infiltrating $\text{Ly6G}^{\text{hi}}\text{Ly6C}^{\text{int}}$ myeloid cells suppress TIL $\text{IFN}\gamma$ production

$\text{Ly6G}^{\text{hi}}\text{Ly6C}^{\text{int}}\text{F4/80}^-$  myeloid cells were isolated from day 20 MOC1 (top panels) or LLC (bottom panels) tumors and combined with cultured TIL stimulated by plate-bound CD3/28 antibodies at a 3:1 myeloid:TIL ratio. TIL were assessed for  $\text{IFN}\gamma$  production by intracellular flow cytometry. Representative dot plots are shown on the left, with quantification shown on the right. \*\*\*

$P < 0.001$ , t-test.

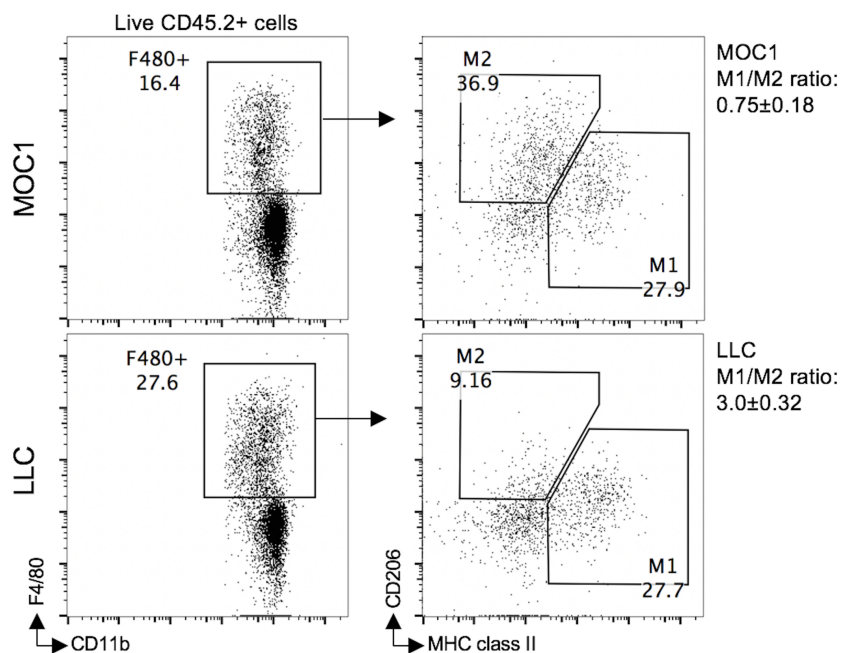

### Supplemental Figure 2 – Baseline phenotype of tumor infiltrating macrophages

Day 20 tumors harvested from MOC1 (top panels) or LLC (bottom panels) were assessed for macrophage phenotype by flow cytometry ( $n=5/\text{group}$ ). M1 macrophages were defined as MHC class II<sup>hi</sup>CD209<sup>low</sup>, whereas M2 macrophages were defined as MHC class II<sup>low</sup>CD206<sup>hi</sup>. The M1/M2 ratio (mean $\pm$ SD) for each model is shown on the right.

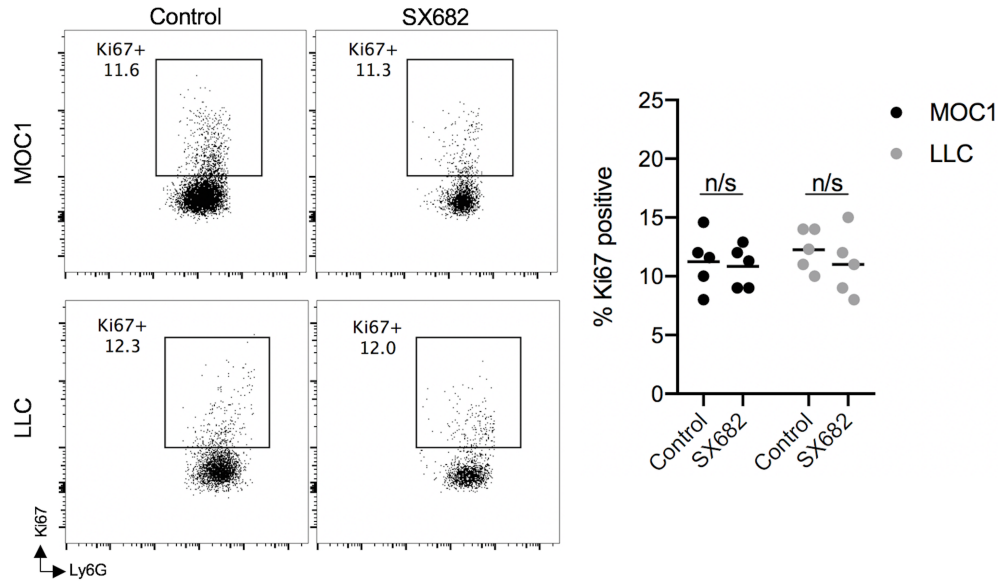

**Supplemental Figure 3 – SX-682 treatment does not alter proliferation of PMN-MDSC within the tumor microenvironment**

PMN-MDSC were isolated from day 25 MOC1 (top panels) or LLC (bottom panels) tumors following 14 days of SX-682 treatment and assessed for intracellular Ki67 positivity by flow cytometry. Representative dot plots of live, CD45.2<sup>+</sup>CD11b<sup>+</sup> cells are shown on the left, with quantification on the right. n/s, non-significant.

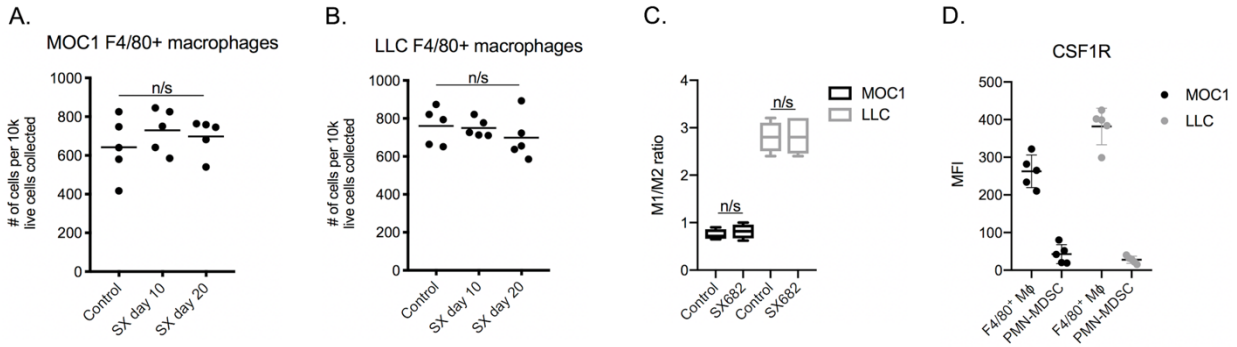

### Supplemental Figure 4 – SX-682 monotherapy does not alter tumor infiltration of F4/80<sup>+</sup> macrophages

Day 25 tumors harvested from MOC1 (A) or LLC (B) tumor bearing mice treated with SX-682 chow beginning at days 10 or 20 after tumor implantation or control chow were assessed for infiltration F4/80<sup>+</sup> macrophages by flow cytometry ( $n=5/\text{group}$ ). C, the M1/M2 macrophage ratio was not significantly altered in either model after SX-682 treatment. D, cell surface CSF1R expression on peripheral macrophages and PMN-MDSC was assessed by flow cytometry. \*\*,  $P<0.01$ ; n/s, non-significant.

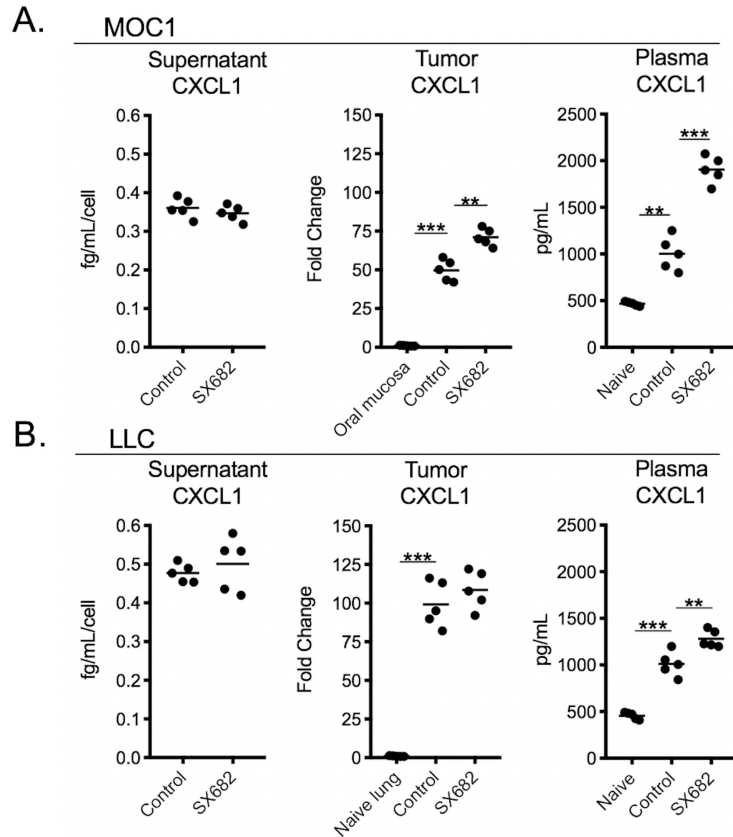

**Supplemental Figure 5 – Abrogation of PMN-PMDSC tumor infiltration with SX-682 not due to alteration of expression of chemokine receptor or ligands**

CXCL1 expression by MOC1 (**A**) or LLC (**B**) cells following exposure to SX-682 (1  $\mu$ M for 24 hours) was assessed by ELISA (left panels). Day 25 plasma harvested from MOC1 or LLC tumor bearing mice treated with SX-682 chow beginning at day 10 after tumor implantation or control chow was assessed by ELISA (middle panels). CXCL1 expression in tumors from the same mice was assessed by qRT-PCR (right panels). \*\*,  $P < 0.01$ ; \*\*\*,  $P < 0.001$ .

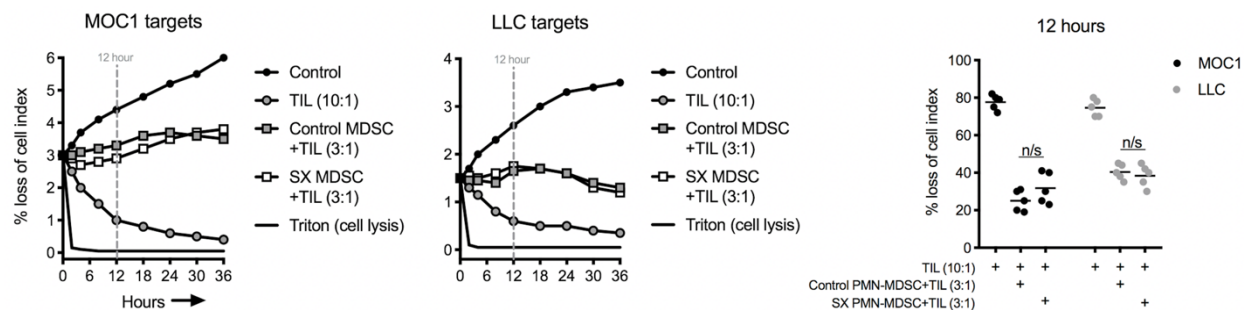

### Supplemental Figure 6 – SX-682 does not alter the immunosuppressive capacity of PMN-MDSC

PMN-MDSC were isolated from MOC1 or LLC tumors at day 25 following treatment with SX-682 chow beginning at day 10 after tumor implantation or control chow and assessed for their ability to suppress TIL killing (10:1 E:T) of parental tumor cells. PMN-MDSC were plated at a 3:1 ratio to TIL. Representative impedance plots on left, with quantification of % loss of cell index at 12 hours quantified on right. n/s, non-significant.
